# Supplementary material for: miR-26a and miR-214 down-regulate expression of the PTEN gene in chronic lymphocytic leukemia, but not PTEN mutation or promoter methylation
Source: PubMed Central journal article supplement (PMC4359232; doi:10.18632/oncotarget.2626), 2014-10-24
Supplement: oncotarget-06-1276-s001.pdf [file oncotarget-06-1276-s001.pdf]

## miR-26a and miR-214 down-regulate expression of the PTEN gene in chronic lymphocytic leukemia, but not PTEN mutation or promoter methylation

### Supplementary Material

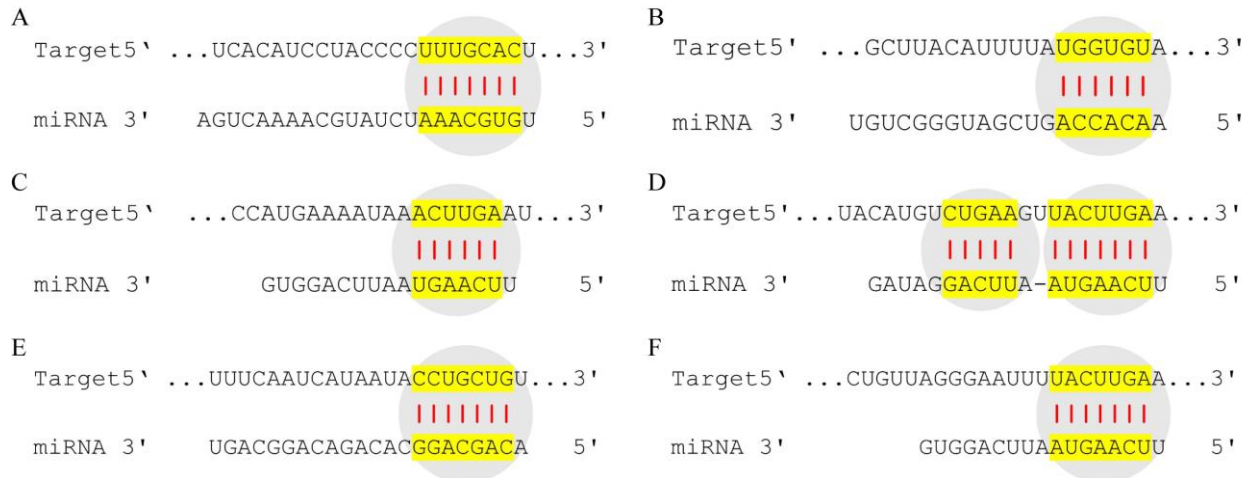

**Supplemental Figure 1:** The bioinformatics predict the possible binding sites of six miRNAs targeting PTEN. **miR-19a (A)**, miR-21 (B), miR-26a (C), miR-26b (D), miR-214 (E) and miR-1297 (F) selectively bind specific PTEN sequences.

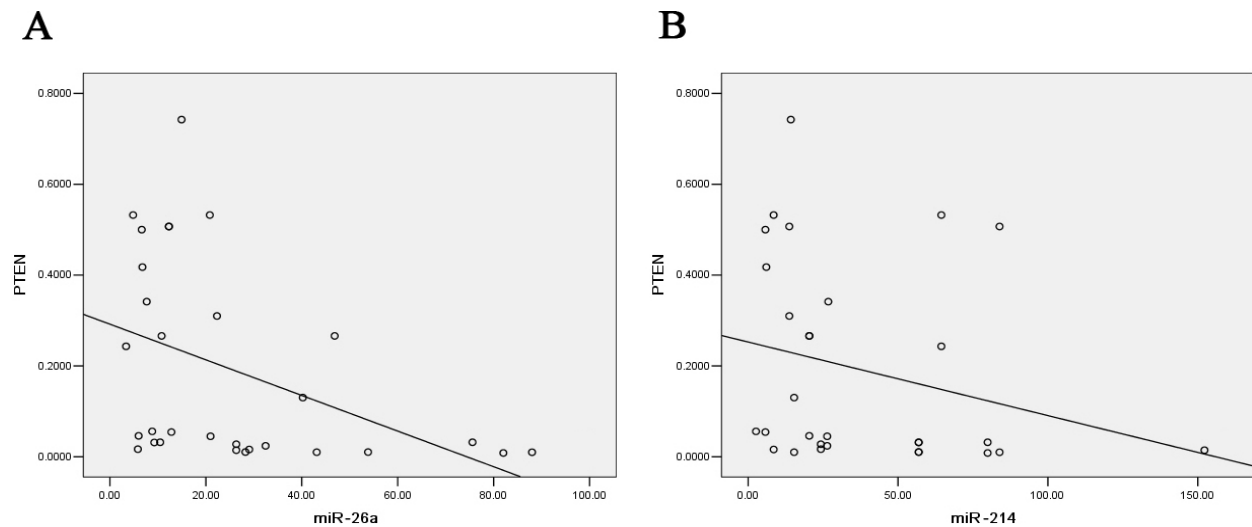

**Supplemental Figure 2:** The PTEN mRNA level have an inverse correlation with miR-26a ( $r=-0.563$ ,  $P=0.001$ , Supplemental Figure 2A) and miR-214 ( $r=-0.418$ ,  $P=0.022$ , Supplemental Figure 2B) in 30 primary CLL patients (X axis: miR-26a or miR-214 expression, Y axis: PTEN mRNA expression).

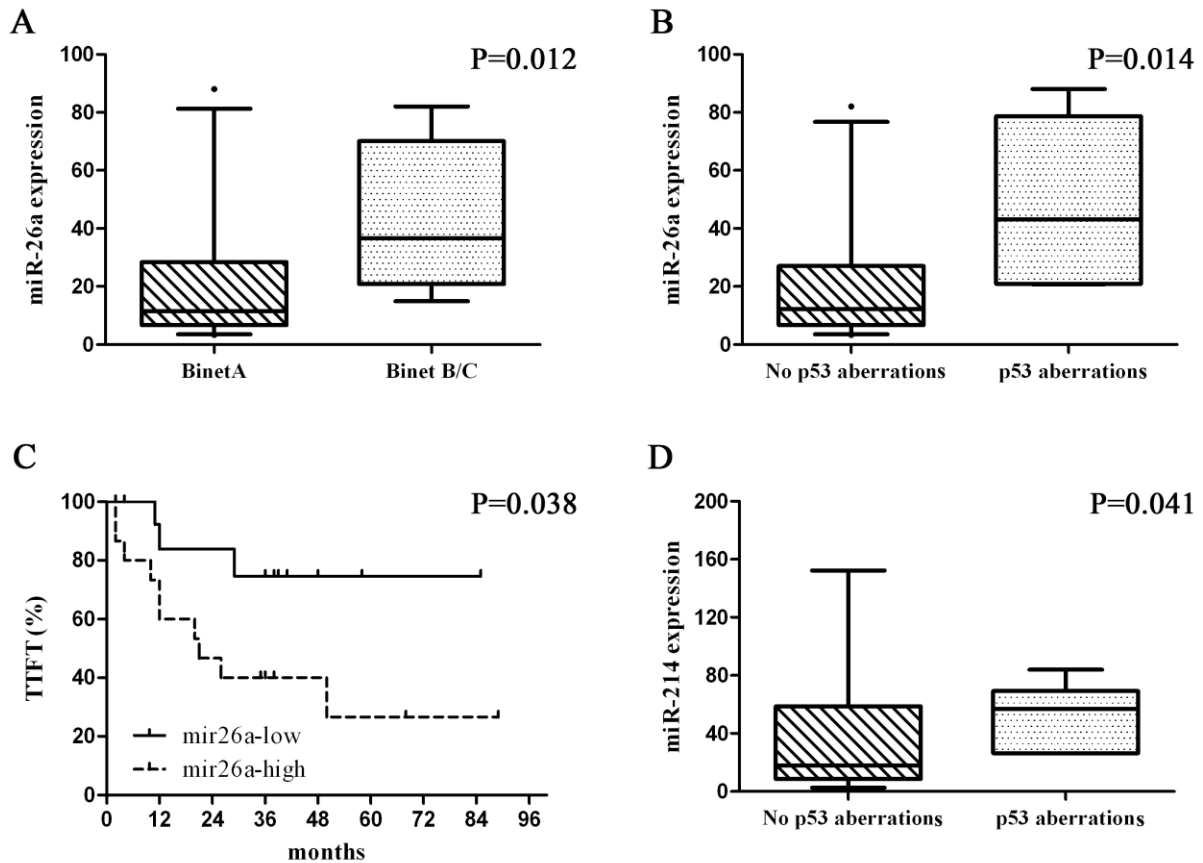

**Supplemental Figure 3:** High expression of miR-26a correlates with adverse clinical characteristics and inferior time to first treatment (TTFT). High expression of miR-26a was associated with advanced Binet stage ( $P=0.012$ , Supplemental Figure 3A), p53 aberrations ( $P=0.014$ , Supplemental Figure 3B) and inferior TTFT ( $P=0.038$ , Supplemental Figure 3C), but high expression of miR-214 was only associated with p53 aberrations ( $P=0.041$ , Supplemental Figure 3D).

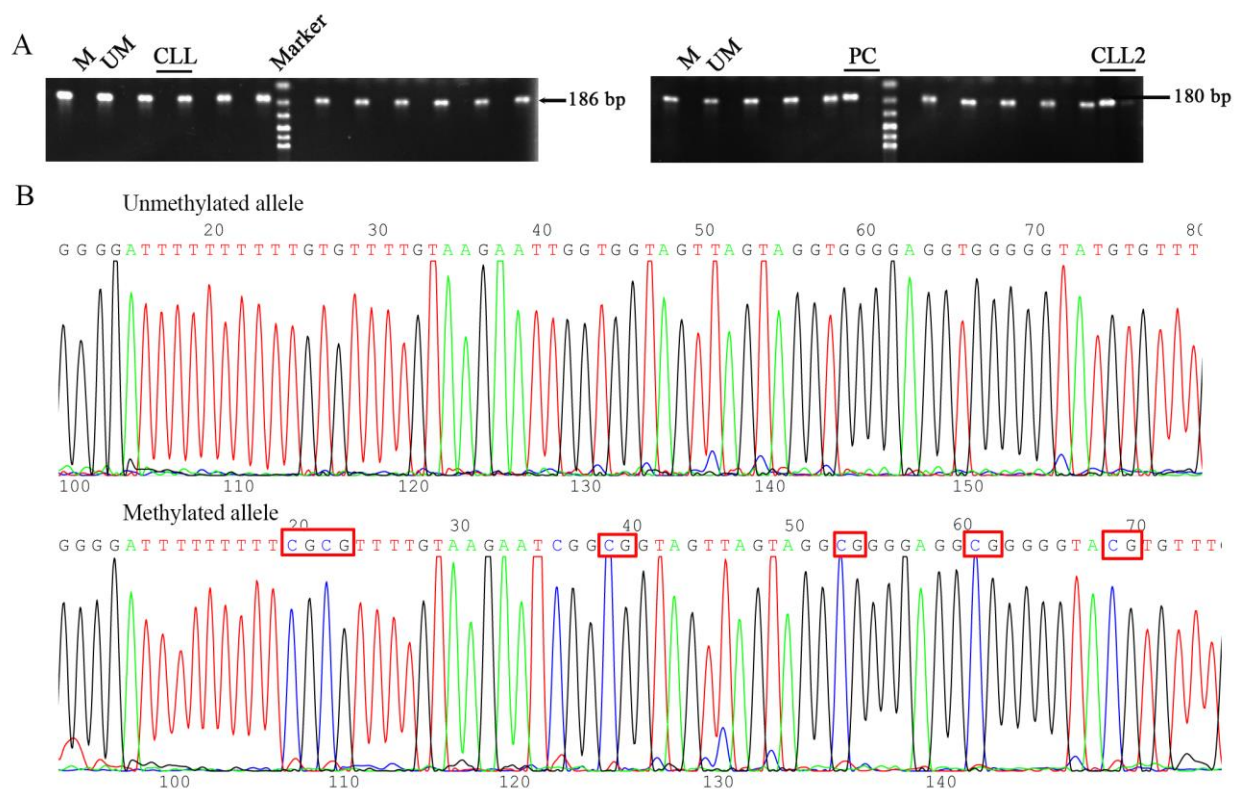

**Supplemental Figure 4: PTEN promoter methylation in CLL patients and controls.** Methylated alleles are detected in only one of 75 (1.33%) CLL patients. (A) Nested methylation-specific PCR (nMSP) is used to evaluate the methylation status of PTEN promoter. M: amplified products with primer specific for methylated allele (180 bp), UM: amplified products with primer specific for unmethylated allele (186 bp), PC: positive control (Methylated HeLa gDNA from Takara), Marker band: 100-600 bp. (B) Chromatogram of the nMSP products sequence. The bases of the box indicate the methylated CpGs islands (CG) or unmethylated ones (TG).

**Supplemental Table 1: Sequences of reverse transcription and PCR primers for miRNA and PTEN**

| Primer  |            | Sequence (5'-3')                                   |
|---------|------------|----------------------------------------------------|
| PTEN-5e | Upstream   | GCAACATTTCTAAAGTTACCTAC                            |
|         | Downstream | TGTTTTCCAATAAATTCTCAGATCCA                         |
| PTEN-6e | Upstream   | ACGACCCAGTTACCATAGCA                               |
|         | Downstream | CTCCTGCATAAATTTCAAATGTGGT                          |
| PTEN-7e | Upstream   | TTGACAGTTTGACAGTTAAAGGCAT                          |
|         | Downstream | TGTCCTTATTTTGGATATTTCTCCC                          |
| PTEN-8e | Upstream   | GTTTAACATAGGTGACAGATTTTCT                          |
|         | Downstream | ACTGCTACGTAAACACTGCT                               |
| PTEN-9e | Upstream   | AGGCCTCTTAAAGATCATGTTTGT                           |
|         | Downstream | TCTGACACAATGTCCTATTGCCA                            |
| PTEN    | Upstream   | GCTGTGGTTGCCACAAAGTGCC                             |
|         | Downstream | GCAGGTAGAAGGCAACTCTGCCA                            |
| β-actin | Upstream   | AGCGAGCAT CCCCCAAAGTT                              |
|         | Downstream | GGGCACGAAGGCTCATCATT                               |
| U6      | Reverse    | GTCGTATCCAGTGCAGGGTCCGAGGTATTCGCACTGGATACGACAAAATA |
|         | Upstream   | CTCGCTTCGGCAGCACATA                                |
|         | Downstream | GTGCAGGGTCCGAGGT                                   |
| miR-21  | Reverse    | GTCGTATCCAGTGCAGGGTCCGAGGTATTCGCACTGGATACGACTCAACA |
|         | Upstream   | GCGGGTAGCTTATCAGACTG                               |
|         | Downstream | GTGCAGGGTCCGAGGT                                   |
| miR-26a | Reverse    | GTCGTATCCAGTGCAGGGTCCGAGGTATTCGCACTGGATACGACAGCCTA |
|         | Upstream   | GCCTTCAAGTAATCCAGGA                                |
|         | Downstream | GTGCAGGGTCCGAGGT                                   |
| miR-214 | Reverse    | GTCGTATCCAGTGCAGGGTCCGAGGTATTCGCACTGGATACGACTGCC   |
|         | Upstream   | GCACAGCAGGCACAGACAG                                |
|         | Downstream | GTGCAGGGTCCGAGGT                                   |
